# Supplementary material for: Unassisted stimulation of autotrophic ethanol bioproduction by visible light
Source: Royal Society of Chemistry journal article supplement (doi:10.1039/d3se00048f), 2023-01-01
Supplement: d3se00048f1.pdf [file d3se00048f1.pdf]

## **Electronic Supplementary Information**

### **Unassisted stimulation of autotrophic ethanol bioproduction by visible light**

#### **Authors**

Wusheng Rao<sup>#</sup>, Yu Kang<sup>#</sup>, Heng Zheng, Muwei Ye, Ziru Liu, Tian Zhang\*, Pier-Luc Tremblay\*

<sup>#</sup>Both authors contributed equally to this work.

**\*Corresponding authors:** tzhang@whut.edu.cn, pierluct@whut.edu.cn

### **Text S1. Differential gene expression for stress response mechanisms**

The transcriptomic analysis of autotrophic *C. autoethanogenum* under visible light also indicates changes in DNA metabolism, cell wall and glycerophospholipid dynamics, exopolysaccharide (EPS) synthesis, and vitamin B12 metabolism. All of the above have been shown in previous studies to be common bacterial responses to stresses such as atmospheric pollution, solvents, radiation, and antibiotics.<sup>1-3</sup> Genes involved in membrane maintenance are possibly participating in the reparation of cell wall structures damaged by visible light. EPS has been shown to protect microbial cells against desiccation, temperature variations, and acid shift.<sup>4,5</sup> Here, transcriptomic data suggest a higher quantity of EPS that could diminish the fraction of visible light reaching the surface of *C. autoethanogenum*'s cell wall. Vitamin B12, an essential cofactor for acetogen metabolism, and its derivatives are light-sensitive molecules susceptible to photodegradation.<sup>6,7</sup> By upregulating vitamin B12-related synthesis genes, the bacterium possibly increases its capacity to replace damaged cofactors.

### **Text S2. Protein abbreviations for Figure 5**

Ack: acetate kinase, ACS: acetyl-CoA synthase, ADH: alcohol dehydrogenase, AdhE: bifunctional acetaldehyde-CoA/alcohol dehydrogenase, Ald: acetaldehyde dehydrogenase, AlsS: acetolactate synthase, AOR: aldehyde:Fd oxidoreductase, Bdh: 2,3-butanediol dehydrogenase, BudA: acetolactate decarboxylase, CODH: carbon monoxide dehydrogenase, Fdh: formate dehydrogenase, FdD: methenyl-THF dehydrogenase, MetF: methenyl-THF reductase, Nfn: NADH-dependent reduced Fd:NADP<sup>+</sup> oxidoreductase,

LDH: lactate dehydrogenase, PFOR: pyruvate:Fd oxidoreductase, Pta:  
phosphotransacetylase, HytA-E: electron bifurcating FeFe-hydrogenase cluster, Rnf: Fd-  
NAD:oxidoreductase complex.

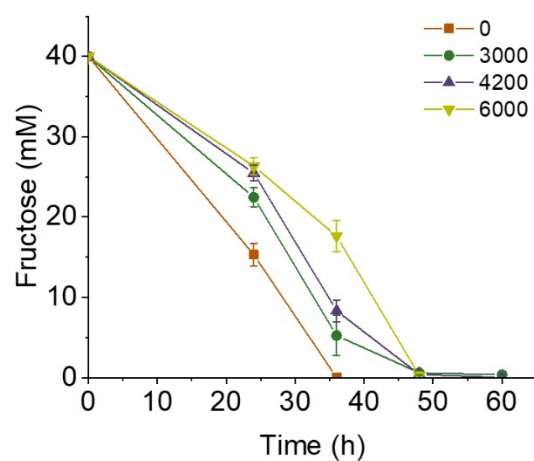

**Fig. S1** Fructose consumption by *C. autoethanogenum* during heterotrophic growth under visible light at different intensities. Each curve is the average of at least triplicate with standard deviation. Light intensity is in lux.

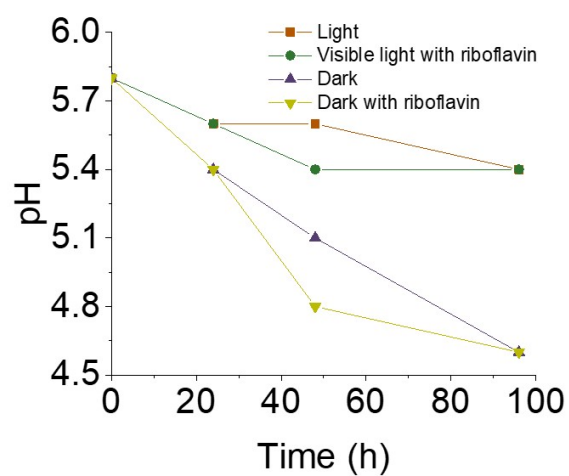

**Fig. S2** Extracellular pH when *C. autoethanogenum* was grown with  $\text{H}_2\text{:CO:CO}_2$  in the dark or under visible at 4200 lux with 1  $\mu\text{M}$  exogenous riboflavin.

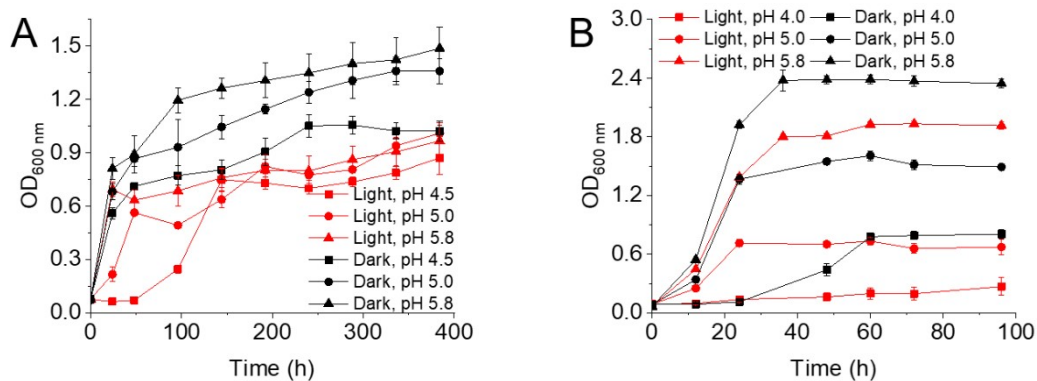

**Fig. S3** Synergistic impact of visible light and initial acidic pH on the growth of *C.*

*autoethanogenum*. OD<sub>600 nm</sub> over time of (E) autotrophic and (F) heterotrophic growth of *C. autoethanogenum* at different initial pH values under white light at 4200 lux. In panels BD, \* indicates p-values  $\leq 0.05$ . Each curve and bar are the averages of at least triplicate with standard deviation.

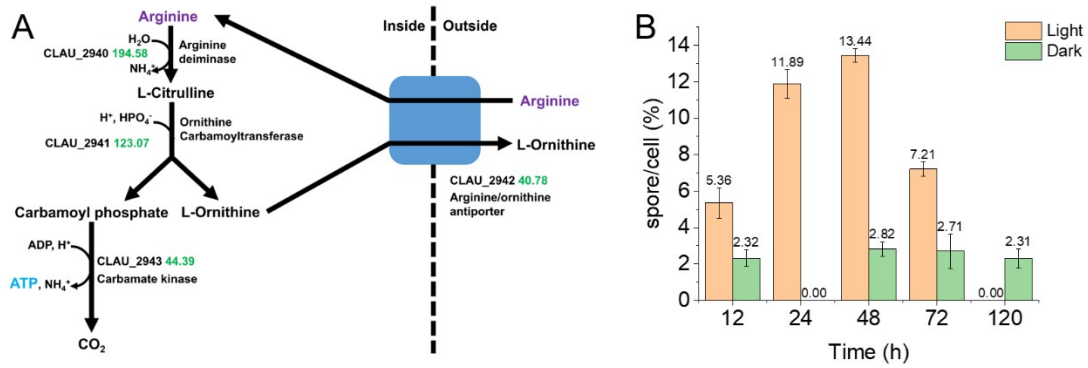

**Fig. S4** Visible light stress response mechanisms in *C. autoethanogenum*. (A)

Differential gene expression in the arginine deiminase pathway. Values in green indicate upregulated genes when autotrophic *C. autoethanogenum* is exposed to light at 4200 lux.

(B) Sporulation in the dark and under visible light. Each bar is the average of at least triplicate with standard deviation.

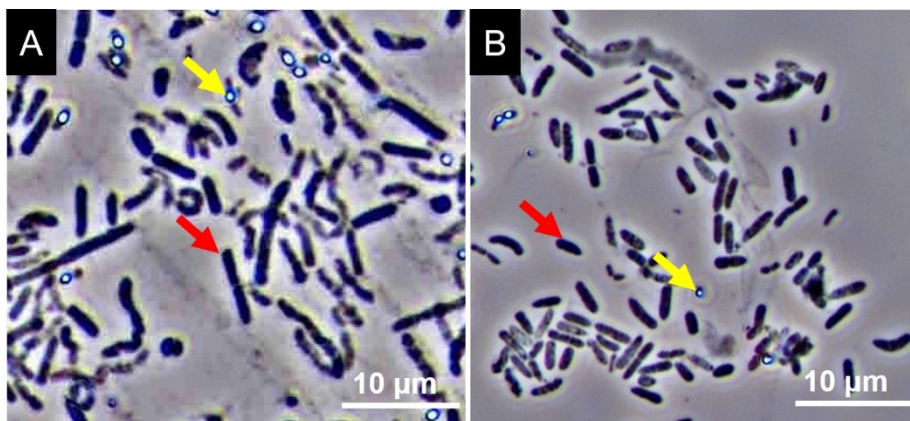

**Fig. S5** Micrographs of sporulating *C. autoethanogenum* grown by gas fermentation with  $\text{H}_2\text{:CO:CO}_2$ . (A) Visible light (4200 lux) and (B) dark growth conditions. The micrographs were taken after 48 hours of cultivation. Red arrows indicate vegetative cells and yellow arrows indicate spores.

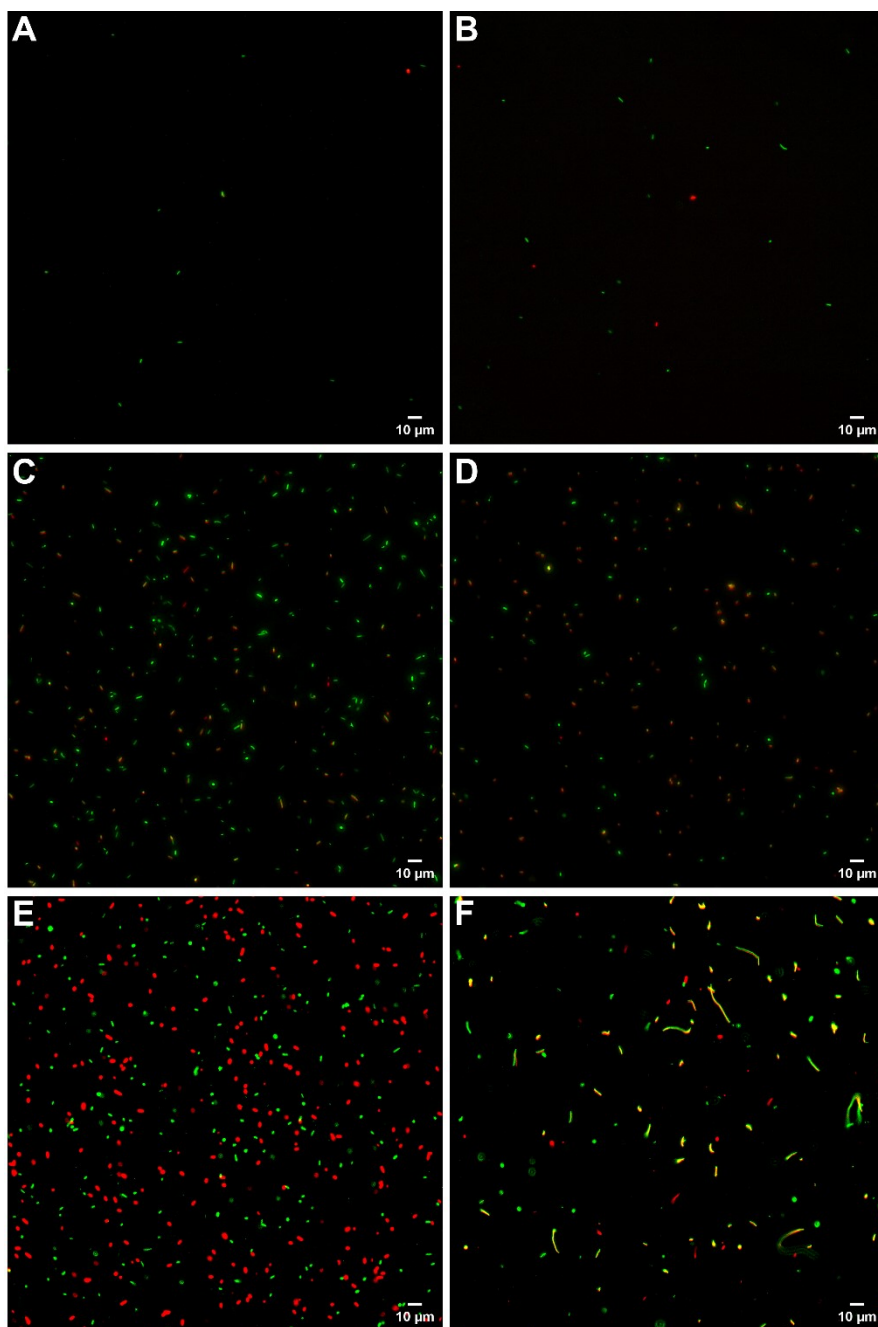

**Fig. S6** Live/dead staining of *C. autoethanogenum* grown autotrophically in the dark or under visible light. Micrographs at (AB) 0 h, (CD) 96 h, and (EF) 200 h of growth. Micrographs of stained bacterial cultures (ADE) in the dark or (BDF) under visible light (4200 lux).

**Table S1.** Composition of the Tanner modified medium per liter.<sup>ab</sup>

| Component               | Quantity |
|-------------------------|----------|
| MES <sup>c</sup>        | 20 g     |
| Yeast extract           | 0.5 g    |
| Mineral solution        | 25 mL    |
| Trace elements solution | 10 mL    |
| Vitamins solution       | 10 mL    |

<sup>a</sup>Where indicated, 40 mM fructose, 1 mM cysteine, and/or 2  $\mu$ M resazurin were added. <sup>b</sup>The initial pH of the medium was 5.8. <sup>c</sup>MES: 2-(*N*-morpholino)ethanesulfonic acid

**Table S2.** Composition of the mineral solution, trace elements solution, and vitamins solution per liter.

| Component                                                                            | Quantity |
|--------------------------------------------------------------------------------------|----------|
| <b>Mineral solution</b>                                                              |          |
| NaCl                                                                                 | 80 g     |
| NH <sub>4</sub> Cl                                                                   | 100 g    |
| KCl                                                                                  | 10 g     |
| MgSO <sub>4</sub> ·7H <sub>2</sub> O                                                 | 20 g     |
| CaCl <sub>2</sub> ·2H <sub>2</sub> O                                                 | 4 g      |
| KH <sub>2</sub> PO <sub>4</sub>                                                      | 10 g     |
| <b>Trace elements solution<sup>a</sup></b>                                           |          |
| Nitriloacetic acid                                                                   | 2 g      |
| Na <sub>2</sub> WO <sub>4</sub>                                                      | 0.2 g    |
| Na <sub>2</sub> SeO <sub>3</sub> ·5H <sub>2</sub> O                                  | 0.1 g    |
| MnSO <sub>4</sub> ·H <sub>2</sub> O                                                  | 1 g      |
| (NH <sub>4</sub> ) <sub>2</sub> Fe(SO <sub>4</sub> ) <sub>2</sub> ·6H <sub>2</sub> O | 0.8 g    |
| ZnSO <sub>4</sub> ·7H <sub>2</sub> O                                                 | 1 g      |
| CoCl <sub>2</sub>                                                                    | 0.2 g    |
| NiCl <sub>2</sub> ·6H <sub>2</sub> O                                                 | 0.2 g    |
| CuCl <sub>2</sub>                                                                    | 0.02 g   |
| Na <sub>2</sub> MoO <sub>4</sub> ·2H <sub>2</sub> O                                  | 0.02 g   |
| <b>Vitamins solution</b>                                                             |          |
| Pyridoxine                                                                           | 10 mg    |
| Thiamine                                                                             | 5 mg     |
| Riboflavin                                                                           | 5 mg     |
| Pantothenic acid                                                                     | 5 mg     |
| Lipoic acid                                                                          | 5 mg     |
| Para-aminobenzoic acid                                                               | 5 mg     |
| Nicotinic acid                                                                       | 5 mg     |
| B12 vitamin                                                                          | 5 mg     |
| Biotin                                                                               | 2 mg     |
| Na-2-mercaptoethane sulfonate                                                        | 10 mg    |
| Folic acid                                                                           | 2mg      |

<sup>a</sup>The pH of the trace elements solution was adjusted to 5.8 with KOH.

## References

- 1 T. Zhang, X.-C. Shi, Y. Xia, L. Mai and P.-L. Tremblay, *Sci. Rep.*, 2019, **9**, 10879.
- 2 X. Fei, S. Li, L. Wang, L. Wang and F. Chen, *Water Sci. Technol.*, 2021, **84**, 1452–1463.
- 3 S. Matallana-Surget and R. Wattiez, *Proteomes*, 2013, **1**, 70–86.
- 4 J. Chen, S. M. Lee and Y. Mao, *Int. J. Food Microbiol.*, 2004, **93**, 281–286.
- 5 D. A. Hufnagel, W. H. Depas and M. R. Chapman, *Microbiol. Spectr.*, **3**, DOI:10.1128/microbiolspec.MB-0014-2014.
- 6 A. Juzeniene and Z. Nizauskaite, *J. Photochem. Photobiol. B*, 2013, **122**, 7–14.
- 7 S. W. Ragsdale and E. Pierce, *Biochim. Biophys. Acta*, 2008, **1784**, 1873–1898.
